# Supplementary material for: Emergence of Two Different Genotypes of Bagaza Virus (BAGV) Affecting Red-Legged Partridges in Spain, in 2019 and 2021
Source: Preprints.org preprint supplement (doi:10.20944/preprints202407.2212.v1), 2024-07-29
Supplement: Supplementary file 1 [file supplementary]

## Sheet: Suppl Table 2
		Supplementary Table 2. Comparison of the amino acid substitutions between complete BAGV/ITMV isolates. The first Spanish isolate from 2010 was used as reference sequence. Spanish isolates (2019 and 2021) obtained in this study were included as well as their closest representatives from BAGV-Genotypes 1 and 2 (Senegal 2014 and Portugal 2021, respectively). Additionally, more representatives from s…
				BAGV-GENOTYPE 2							BAGV-GENOTYPE 1
		PROTEIN	Amino Acid Position	HQ644143.1 (Spain 2010) Red-legged partridge	PP236851 (Spain 2021) Red-legged partridge	KC734552.1 (Israel 2010) Domestic turkey	MW672101.1 (Namibia 2018) Cx. univittatus	KC734552.1 (Israel 2010) Domestic turkey	MW672101.1 (Namibia 2018) Cx. univittatus	LC730845.1 (Portugal 2021) Red-legged partridge	PP236854 (Spain 2019) Red-legged partridge	PP236853 (Spain 2019) Red-legged partridge	PP236852 (Spain 2019) Red-legged partridge	KC734550.1 (Israel 1995) Domestic turkey	MF380424.1 (Senegal 1989) Cx. poicilipes	MF380433.1 (Senegal 2001) Cx. poicilipes	MF380432.1 (Senegal 2001) Cx. poicilipes	MF380427.1 (Senegal 2004) Cx. poicilipes	MF380428.1 (Senegal 2004) Cx. poicilipes	MF380434.1 (Senegal 2014) Cx. poicilipes
		Flavi_capsid	29	S	.	.	.	.	.	.	.	.	.	.	.	.	.	.	F	.
			35	L	.	.	.	.	F	.	.	.	.	.	.	.	.	.	.	.
			45	V	.	I	I	I	I	.	.	.	.	.	.	.	.	.	.	.
			53	A	.	T	T	T	T	.	T	T	T	T	T	T	T	T	T	T
			73	V	.	.	.	.	.	.	.	.	.	.	.	.	.	G	.	.
			76	V	.	.	.	.	.	.	.	.	.	.	.	.	.	G	.	G
			78	A	.	.	.	.	.	.	.	.	.	.	.	.	.	.	T	.
			79	T	.	.	.	.	.	.	.	.	.	.	.	.	.	P	.	.
			80	R	.	.	.	.	.	.	.	.	.	.	.	.	.	P	.	.
			83	K	R	.	.	.	.	R	.	.	.	.	.	.	.	.
			92	M	.	.	.	.	.	.	.	.	.	.	I	.	.	.	.	.
			100	G	S	.	.	.	.	S	.	.	.	.	.	.	.	.	.	.
			108	T	.	.	.	.	.	.	I	I	I	.	A	.	.	.	.	.
			109	L	V	V	A	V	A	V	T	T	T	V	A	V	V	V	V	S
			110	G	.	.	.	.	.	.	.	.	.	S	.	.	.	.	.	.
			111	I	.	.	.	.	.	.	.	.	.	V	.	.	.	.	.	.
			112	A	.	.	.	.	.	.	.	.	.	V	S	.	.	.	.	.
			113	I	.	V	.	V	.	.	V	V	V	.	V	F	F	F	F	V
			115	A	V	V	V	V	V	V	V	V	V	V	V	V	V	V	V	V
			116	V	.	.	.	.	.	.	A	A	A	.	A	A	A	A	A	A
		Flavi_propepeptide	139	T	.	.	.	.	.	.	.	.	.	.	.	A	A	A	A	.
			150	A	.	T	.	T	.	.	T	T	T	.	T	.	.	.	.	T
			164	G	.	.	.	.	.	.	.	R	.	.	.	.	.	.	.	.
			166	I	M	M	M	M	M	M	M	M	M	M	M	M	M	M	M	M
			183	D	.	.	.	.	.	.	.	.	.	.	V	.	.	.	.	.
		Flavi_glycoprot_E	294	G	.	.	.	.	.	.	.	.	.	.	.	.	.	F	.	.
			296	Q	.	.	.	.	.	.	.	.	.	.	.	.	.	D	.	.
			297	N	.	.	.	.	.	.	.	.	.	.	I	.	.	T	.	.
			298	R	.	.	.	.	.	.	.	.	.	.	Q	.	.	.	.	.
			299	D	.	.	.	.	.	.	.	.	.	.	K	.	.	G	.	.
			300	F	.	.	.	.	.	.	.	.	.	.	I	.	.	.	.	.
			301	V	.	.	.	.	.	.	.	.	.	.	.	.	.	W	.	.
			306	G	.	.	.	.	.	.	.	.	.	.	.	.	.	R	.	.
			307	V	.	.	.	.	.	.	.	.	.	.	.	.	.	H	.	.
			308	E	.	.	.	.	.		.	.	.	.	.	.	.	G	.	.
			314	M	.	.	.	.	.	.	.	.	.	.	.	.	.	I	.	.
			315	E	.	.	.	.	.	.	.	.	.	.	.	.	.	G	.	.
			316	G	.	.	.	.	.	.	.	.	.	.	.	.	.	C	.	.
			318	G	.	.	.	.	.	.	.	.	.	.	.	.	.	S	.	.
			327	K	.	.	.	.	.	.	.	.	.	.	.	.	.	S	.	.
			328	P	.	.	.	.	.	.	.	.	.	.	.	.	.	L	.	.
			336	N	.	.	.	.	.	.	.	.	.	.	.	.	.	D	.	.
			337	M	.	.	.	.	.	.	.	.	.	.	.	.	.	V	.	.
			338	E	.	.	.	.	.	.	.	.	.	.	.	.	.	G	.	.
			351	E	.	K	.	K	.	.	.	.	.	.	.	.	.	.	.	.
			355	T	.	.	.	.	.	.	.	.	.	.	.	.	.	N	.	.
			360	E	.	.	.	.	.	.	.	.	.	A	.	.	.	.	.	.
			361	P	.	.	.	.	.	.	.	.	.	S	.	.	.	A	.	.
			364	P	.	.	.	.	.	.	.	.	.	.	.	.	.	T	.	.
			365	T	.	.	.	.	.	.	.	.	.	.	.	.	.	A	.	.
			378	E	.	.	.	.	.	.	.	.	.	M	.	.	.	.	.	.
			382	K	.	.	.	.	.	.	.	.	.	.	.	M	N	.	.	.
			383	K	.	.	.	.	.	.	.	.	.	.	.	I	I	.	.	.
			384	G	.	.	.	.	.	.	.	.	.	.	.	.	.	S	.	.
			386	T	.	.	.	.	.	.	.	.	.	.	.	.	.	P	.	.
			387	D	.	.	.	.	.	.	.	.	.	.	.	.	.	A	.	.
			389	G	.	.	.	.	.	.	.	.	.	.	.	.	.	S	.	.
			390	W	.	.	.	.	.	.	.	.	.	.	.	.	.	R	.	.
			398	G	.	.	.	.	.	.	.	.	.	.	.	.	.	.	A	.
			406	A	.	.	.	.	.	.	.	.	.	T	.	.	.	.	.	.
			414	A	.	.	.	.	.	.	.	.	.	.	.	G	.	.	.	.
			421	K	.	.	.	.	.	.	.	.	.	.	.	.	M	.	M	.
			422	E	.	.	.	.	.	.	.	.	.	.	.	.	.	.	Q	.
			439	G	.	.	.	.	.	.	.	.	.	.	.	.	.	.	A	.
			440	T	.	.	.	.	.	.	.	.	.	.	.	.	.	.	P	.
			441	Y	.	.	.	.	.	.	.	.	.	H	.	.	.	.	.	.
			442	N	.	.	.	.	.	.	.	.	.	Y	.	.	.	.	.	.
			443	N	.	.	.	.	.	.	.	.	.	.	.	D	D	.	H	.
			445	S	.	.	.	.	.	.	.	.	.	.	.	F	F	F	F	.
			447	Q	.	.	.	.	.	.	.	.	.	.	.	.	L	.	L	.
			452	Q	.	.	.	.	.	.	.	.	.	.	.	.	.	.	H	.
			466	T	.	.	.	.	.	.	.	.	.	.	.	.	.	.	I	.
			467	A	.	.	.	.	.	.	.	.	.	.	.	.	.	.	V	.
			475	V	.	.	.	.	.	.	.	.	.	.	.	.	.	.	A	.
			478	E	.	.	.	.	.	.	.	.	.	.	.	.	.	.	A	.
			491	Y	.	.	.	.	.	.	.	.	.	.	.	.	.	.	S	.
			564	T	.	.	.	.	.	.	A	A	A	A	A	A	A	A	A	A
			574	H	.	.	.	.	.	.	.	.	.	Y	.	.	.	.	.	.
			593	M	.	.	.	.	.	.	.	.	.	.	.	I	.	.	.	.
		Flavi_E_C	633	A	.	.	.	.	.	.	.	.	.	.	.	.	.	P	.	.
			635	L	.	.	.	.	.	.	.	.	.	.	.	.	.	R	.	.
			639	T	.	.	.	.	.	.	.	.	.	.	.	.	.	Q	.	.
			659	K	.	.	.	.	.	R	.	.	.	.	.	.	.	.	.	.
		Flavi_E_stem	697	F	.	.	.	.	.	.	.	.	.	.	.	.	.	L	.	.
			698	M	.	.	.	.	.	.	.	.	.	.	.	.	.	L	.	.
			699	S	.	.	.	.	.	F	.	.	.	.	.	.	.	.	.	.
			709	A	.	.	.	.	.	.	.	.	.	.	.	.	.	T	.	.
			713	T	.	.	.	.	.	.	.	.	.	.	.	.	.	P	.	.
			721	G	.	.	.	.	.	.	.	.	.	.	.	.	.	E	.	.
			730	G	.	.	.	.	.	.	.	.	.	.	.	.	.	R	.	.
			735	F	.	.	.	.	.	.	.	.	.	.	.	.	.	V	.	.
			741	S	.	.	.	.	G	.	.	.	.	.	.	.	.	.	.	.
		Flavi_NS1	799	D	.	.	.	.	.	.	.	.	.	.	Y	.	.	.	.	.
			835	V	.	I	.	I	.	.	.	.	.	.	.	.	.	.	.	.
			838	E	.	.	.	.	.	D	.	.	.	.	.	.	.	.	.	.
			841	E	.	.	.	.	.	.	G	G	G	.	G	.	.	.	.	G
			842	K	.	.	.	.	.	.	R	R	R	.	.	.	.	.	.	R
			862	K	.	.	.	.	.	.	.	.	.	.	.	Q	.	.	.	.
			869	L	.	.	.	.	.	.	.	.	.	.	.	P	.	.	.	.
			874	Q	.	.	.	.	.	.	.	.	.	.	.	P	.	.	.	P
			889	K	.	.	.	.	.	.	.	.	.	.	.	E	.	.	.	.
			896	W	L	.	.	E	.	L	.	.	.	.	.	.	.	.	.	.
			906	K	.	.	.	.	.	.	.	.	.	.	.	.	.	.	.	.
			909	G	.	.	.	.	.	.	.	.	.	.	.	.	.	.	.	E
			931	K	.	.	.	.	.	.	.	.	.	R	.	.	.	.	.	.
			954	S	.	.	.	.	.	.	.	.	.	A	.	.	.	.	.	.
			1005	A	.	.	.	.	.	.	.	.	.	V	.	.	.	.	.	.
			1006	V	.	.	.	.	.	.	.	.	.	.	G	.	.	.	.	.
			1010	I	.	.	.	.	.	.	V	V	V	V	V	V	V	V	V	V
			1051	K	R	.	.	.	.	R	.	.	.	.	.	.	.	.	.	.
			1054	V	.	.	.	.	.	.	.	.	.	.	.	.	.	.	.	G
			1135	L	.	.	.	.	.	.	.	.	.	.	.	W	.	.	.	.
			1141	T	.	I	.	I	.	.	.	.	.	.	.	.	.	.	.	.
			1143	Y	.	.	.	.	H	.	.	.	.	.	.	.	.	.	.	.
			1146	A	.	.	.	.	.	.	.	.	.	.	T	.	.	.	.	.
			1151	F	.	.	.	.	.	.	.	.	.	.	S	.	.	.	.	.
		Flavi_NS2A	1157	M	.	.	.	.	.	.	.	.	.	.	L	.	.	.	.	.
			1159	F	.	.	.	.	.	.	.	.	.	.	L	.	.	.	.	.
			1174	V	M	M	M	M	M	M	M	M	M	M	M	M	M	M	M	M
			1202	L	.	.	.	.	.	M	.	.	.	.	M	.	.	.	.	.
			1203	V	.	.	.	.	.	.	.	.	.	.	L	.	.	.	.	.
			1247	T	.	.	.	.	.	.	.	.	.	.	N	.	.	.	.	.
		DUF389 domain of unknown function	1299	L	.	.	.	.	.	.	.	.	.	V	.	.	.	.	.	.
			1305	R	.	K	.	K	.	.	K	K	K	K	K	K	K	K	K	K
			1306	I	.	M	.	M	.	.	.		.	.	.	.	.	.	.	.
			1307	V	.	.	.	.	.	.	I	I	I	.	I	I	I	I	I	I
			1309	I	.	.	.	.	.	.	.	.	.	V	.	.	.	.	.	.
			1311	V	.	.	.	.	.	.	.	.	.	.	.	.	.	E	.	.
			1319	V	.	.	.	.	.	.	I	I	I	I	I	I	I	I	I	I
			1324	L	.	.	.	.	.	.	.	.	.	.	.	.	.	F	.	.
			1332	I	.	.	.	.	.	.	V	V	V	.	.	.	.	.	.	.
			1342	G	.	.	.	.	.	.	.	.	.	.	.	.	V	.	.	.
			1344	A	.	.	.	.	.	.	.	.	.	.	.	.	.	S	.	.
		Flavi_NS2B	1380	V	.	.	.	.	.	.	.	.	.	.	.	A	.	.	.	.
			1397	D	.	.	.	.	.	.	.	.	.	.	.	N	.	.	.	.
			1434	D	.	.	.	.	.	.	.	.	.	.	E	.	.	.	.	.
			1495	I	.	.	.	.	.	.	.	.	.	.	.	T	T	T	T	.
			1511	K	.	.	.	.	.	.	R	R	R	R	R	R	R	R	R	R
			1513	K	.	.	R	.	R	.	.	.	.	.	.	.	.	.	.	.
			1519	S	.	.	.	.	.	.	.	.	.	.	T	.	.	.	.	.
		Flavi_NS3 serine protease	1547	H	.	.	.	.	.	R	.	.	.	.	.	.	.	.	.	.
			1550	W	.	.	.	.	.	.	.	.	.	.	C	.	.	.	.	.
			1562	D	.	.	.	.	.	.	.	.	.	.	.	.	.	.	.	V
			1567	P	.	.	.	.	.	.	.	.	.	.	R	.	.	.	.	.
			1574	D	.	.	.	.	.	.	.	.	.	.	.	E	E	E	E	.
			1592	V	.	.	.	.	.	.	.	.	.	I	.	.	.	.	.	.
			1643	E	.	.	.	.	.	.	.	.	.	.	.	.	.	K	.	.
			1649	L	.	.	.	.	.	.	.	.	.	.	V	.	.	.	.	.
		DEAD-like helicases superfamily	1685	R	.	.	.	.	.	.	.	.	.	.	.	.	.	S	.	.
			1687	R	.	.	.	.	.	.	.	.	.	.	.	.	.	M	.	.
			1711	T	.	.	.	.	.	.	.	.	.	.	.	.	.	P	.	.
			1714	D	.	.	.	.	.	.	.		.	.	E	.	.	.	.	.
			1716	R	.	.	.	.	.	.	.	.	.	.	.	.	.	K	.	.
			1722	L	.	.	.	.	.	.	.	.	.	.	.	.	.	S	.	.
			1738	E	.	.	.	.	.	.	.	.	.	.	.	.	.	G	.	.
			1755	T	.	.	.	.	.	.	.	.	.	.	.	.	.	P	.	.
			1758	V	.	.	.	.	.	.	I	I	I	.	I	I	I	I	I	I
			1771	L	.	.	.	.	.	.	.	.	.	.	.	.	.	P	.	.
			1780	N	.	.	.	.	.	.	.	.	.	.	.	.	.	H	.	.
			1834	M	.	.	.	.	.	.	V	V	V	V	V	V	V	V	V	V
			1836	V	.	.	.	.	.	.	L	L	L	.	.	.	.	.	.	.
			1853	T	.	.	.	.	.	.	.	.	.	.	P	.	.	.	.	.
		Helicase superfamily c-terminal domain	1863	V	.	.	.	.	.	.	.	.	.	.	.	G	.	.	.	.
			1885	Q	.	.	.	.	.	P	.	.	.	.	.	.	.	.	.	.
			1887	N	.	.	.	.	.	Y	.	.	.	.	.	.	.	.	.	.
			1934	I	.	.	.	.	.	.	.		.	.	V	.	.	.	.	.
			1935	I	.	.	.	.	.	.	.	.	.	.	V	.	.	.	.	.
			1943	Q	.	.	.	.	.	.	.	.	.	K	.	.	.	.	.	.
			1967	V	.	.	.	.	.	.	.	.	.	.	.	.	.	L	.	.
.			2049	Y	.	.	.	.	.	.	.	.	.	.	H	H	H	H	H	.
			2113	E	D	D	D	D	D	D	D	D	D	D	D	D	D	D	D	D
			2122	I	.	V	.	V	.	.	.	.	.	.	.	.	.	.	.	.
		Flavi_NS4A	2177	T	.	A	.	A		.	.	.	.	.	.	.	.	.	.	.
			2215	V	.	.	.	.	.	.	A	A	A	.	.	.	.	.	.	.
			2262	V	.	.	.	.	.	.	I	I	I	I	I	I	I	I	I	I
			2265	T	.	.	.	.	.	.	A	A	A	.	.	.	.	.	.	A
		Flavi_NS4B	2283	S	N	.	.	.	.	N	.	.	.	.	.	.	.	.	.	.
			2288	A	.	T	.	T	.	T	.	.	.	.	.	.	.	.	.	.
			2294	S	.	.	.	.	.	.	.	.	.	G	.	.	.	.	.	.
			2358	I	T	.	.	.	.	T	.	.	.	.	.	.	.	.	.	.
			2362	T	.	.	.	.	.	.	.	.	.	.	S	.	.	.	.	.
			2383	M	.	.	L	.	L	.	.	.	.	.	.	.	.	.	.	.
			2435	I	V	.	.	.	.	V	.		.	.	.	F	.	.	.	.
			2446	I	.	.	.	.	.	.	.	.	.	.	.	C	.	.	.	.
			2475	T	.	.	.	.	.	.	.	.	.	.	.	N	.	.	.	N
			2477	I	.	.	.	.	.	.	.	.	.	.	.	D	.	.	.	D
			2478	E	.	.	.	.	.	.	.	.	.	.	.	R	.	.	.	R
			2479	G	.	.	.	.	.	.	.	.	.	.	.	R	.	.	.	R
			2480	A	.	.	.	.	.	.	.	.	.	.	.	.	.	.	.	S
			2481	A	.	.	.	.	.	.	.	.	.	.	.	.	.	.	.	S
			2482	G	.	.	.	.	.	.	.	.	.	.	.	.	.	.	.	R
			2483	R	.	.	.	.	.	.	.	.	.	.	.	.	.	.	.	T
			2484	I	.	.	.	.	.	.	.	.	.	.	.	.	.	.	.	D
			2485	W	.	.	.	.	.	.	.	.	.	.	.	.	.	.	.	M
			2486	N	.	.	.	.	.	.	.	.	.	.	.	.	.	.	.	E
			2487	A	.	.	.	.	.	.	.	.	.	.	.	.	.	.	.	C
			2517	N	.	.	S	.	S	.	.	.	.	.	.	.	.	.	.	.
			2519	S	.	.	.	.	.	.	.	.	.	.	.	.	.	.	.	G
		FtsJ FtsJ-like methyltransferase	2652	I	V	.	.	.	.	V	.	.	.	V	.	.	.	.	.	.
			2654	I	.	.	.	.	.	.	.	.	.	V	.	.	.	.	.	.
			2698	T	.	.	.	.	.	.	.	.	.	.	.	.	.	.	.	I
			2703	I	V	V	.	V	.	V	.	.	.	.	.	.	.	.	.	.
			2722	L	.	.	.	.	.	.	.	.	.	S	.	S	S	S	S	.
		Flavi_NS5	2799	N	.	.	.	.	.	.	K	K	K	K	K	K	K	K	K	K
			2806	T	.	.	.	.	.	.	M	M	M	.	M	M	M	M	M	M
			2829	Y	.	.	.	.	.	.	.	.	.	.	.	.	.	C	.	.
			2839	G	.	.	.	.	.	.	.	.	.	.	.	.	.	D	E	.
			2852	L	.	.	.	.	.	.	.	.	.	.	.	.	.	S	.	.
			2856	W	.	.	.	.	.	.	.	.	.	.	.	.	.	S	.	.
			2863	V	.	.	.	.	.	.	.	.	.	.	.	S	.	.	.	.
			2866	A	.	.	.	.	.	.	.	.	.	.	.	.	.	T	.	.
			2870	T	.	.	.	.	.	.	.	.	.	.	.	.	.	M	.	.
			2871	T	.	.	.	.	.	.	.	.	.	.	.	.	.	I	.	.
			2872	P	.	.	.	.	.	.	.	.	.	.	.	.	.	S	S	.
			2873	F	.	.	.	.	.	.	.	.	.	.	.	.	.	S	.	.
			2879	F	.	.	.	.	.	.	.	.	.	.	.	.	.	.	V	.
			2891	P	.	.	.	.	.	.	.	.	.	.	.	.	.	R	.	.
			2893	G	.	.	.	.	.	.	.	.	.	.	.	.	.	R	.	.
			2895	A	.	S	.	S	.	.	S	S	S	S	S	S	S	S	S	S
			2914	R	.	.	K	.	K		.	.	.	.	.	.	.	.	.	.
			2929	S	.	.	.	.	.	.	.	.	.	.	.	.	.	.	R	.
			2954	A	.	T	.	T	.	.	.	.	.	.	.	.	.	.	.	.
			2970	R	.	.	.	.	.	.	.	.	.	.	K	K	K	K	K	.
			3047	A	.	.	.	.	.	.	.	.	.	.	.	.	.	S	.	.
			3048	G	.	.	S	.	S		S	S	S	.	S	.	.	.	.	.
			3050	E	.	.	.	.	.	.	.	.	.	.	.	.	K	.	.	.
			3060	R	.	.	.	.	.	.	.	.	.	K	.	.	.	.	.	.
			3082	D	.	E	.	E	.	.	.	.	.	.	.	.	.	.	.	.
			3112	I	.	.	.	.	.	.	.	.	.	V	.	.	.	.	.	.
			3193	V	.	.	.	.	.	.	.	.	.	.	.	.	L	.	.	.
			3212	S	.	A	.	A	.	.	.	.	.	.	.	.	.	.	.	.
			3286	G	S	.	.	.	.	S	.	.	.	.	.	.	.	.	.	.
			3312	V	.	.	.	.	.	.	.	.	.	I	.	.	.	.	.	.
			3372	S	.	.	.	.	.	.	G	G	G	.	.	.	.	.	.	.
