# Supplementary material for: Emergence of Two Different Genotypes of Bagaza Virus (BAGV) Affecting Red-Legged Partridges in Spain, in 2019 and 2021
Source: Preprints.org preprint supplement (doi:10.20944/preprints202407.2212.v1), 2024-07-29
Supplement: Supplementary file 1 [file supplementary]

**Supplementary Table 1.** Sequences of primers specifically designed to complete the whole genome sequencing of the Spanish BAGV isolates displayed in this study.

| Primer ID<br>(ref. MF380434.1 ) | Sequence (5' - 3')               |
|---------------------------------|----------------------------------|
| BagV-4201F                      | GGATGGCCAGTGAGTGAAGCC            |
| BagV-4754cR                     | TCGTCACATGCCACATCGTG             |
| BagV-4968F                      | CAGTCACCCTTGATTACCC              |
| BagV-5649cR                     | ATCCACTCATATCCTGAGTTCC           |
| BagV-4959F                      | GGAGAAATCGGAGCAGTCAC             |
| BagV-5627R                      | CCTGAGTTCCATGCTCTGTC             |
| BagV-7704F                      | CCCAACTCAATCAATTAACACGG          |
| BagV-8239R                      | CAGGACTCTTGGCATGTATGG            |
| BagV-8151F                      | TGCAAACCTGTGGATGAGTGG            |
| BagV- 8778R                     | GCCGTGATTTTCATGACTTCTG           |
| BagV-8541F                      | GAATTTTCCACCACATGGC              |
| BagV- 9168R                     | CTGCTCATCCAGTGATCCTCG            |
| BagV-9028F                      | CATGATGGGAAAGAGAGAAAAGAAAATGGGAG |
| BagV-9584R                      | CCAACCCTTCAACTTCTTCAGGCTTCAGC    |
| BagV-10549F                     | GCCACCGGATGTTGGATG               |
| BagV-10941cR                    | AGACACTGTGTTCTACCACCA            |
